# Supplementary material
Source: bioRxiv or medRxiv preprint supplement (https://www.biorxiv.org/highwire/filestream/53728/field_highwire_adjunct_files/3/178806-12.pdf)
Supplement: Supplementary file [file 178806-12.pdf]

## Supplementary Methods

### Expected numbers of IDP replications

To calculate the chance of replicating an individual SNP-IDP association in the replication set of 930 subjects we extracted the following information for each SNP detailed in Supplementary Tables S1 and S2

$p$  = non-reference allele frequency

$\beta$  = estimated effect size

If we let  $Y$  denote a phenotype and  $G$  denote the genotypes at a SNP with frequency  $p$  and effect size  $\beta$ , then consider the regression of  $Y$  on  $G$ . The variance of the SNP effect will be  $\beta^2 p(1 - p)$ . If we assume that the phenotype has been mean centered and scaled to have variance 1, and that the SNP is likely to account for a very small fraction of the phenotype variance, then the estimated residual variance in the regression will be close to 1. This implies that the non-centrality parameter of the F-test for a non-zero effect size at the SNP, when  $Y$  is regressed onto  $G$ , will be approximately

$$\eta = N\beta^2 p(1 - p)$$

where  $N$  is the sample size.

Therefore, if  $F$  is a random variable with  $F$ -distribution with 1 and  $N$  degrees of freedom and non-centrality parameter  $\eta$ , then the probability that the SNP will show an association at the 5% significance level is approximately equal to probability that  $F$  is greater than  $f$ , the 95% point of an  $F$ -distribution with 1 and  $N$  degrees of freedom and non-centrality parameter 0.

These replication probabilities were calculated for each SNP in Supplementary Tables S1 and S2. The probabilities were then summed to give the expected number of replications.
